# Supplementary material for: CD300c is uniquely expressed on CD56bright Natural Killer Cells and differs from CD300a upon ligand recognition
Source: PubMed Central journal article supplement (PMC4819222; doi:10.1038/srep23942), 2016-04-04
Supplement: srep23942-s1.pdf [file srep23942-s1.pdf]

**CD300c is uniquely expressed on CD56<sup>bright</sup> Natural Killer Cells and differs from CD300a upon ligand recognition.**

Milena Dimitrova<sup>a</sup>, Olatz Zenarruzabeitia<sup>b,c</sup>, Francisco Borrego<sup>b,c,d</sup> and Venkateswara R. Simhadri<sup>a,1</sup>.

<sup>a</sup>Division of Biotechnology Review and Research-I, Office of Biotechnology Products Review and Research, CDER, Food and Drug Administration, USA. <sup>b</sup>Immunopathology Group, BioCruces Health Research Institute, Barakaldo, Spain. <sup>c</sup>Immunotherapy Group, Basque Center for Transfusion and Human Tissues, Galdakao, Spain. <sup>d</sup>Ikerbasque, Basque Foundation for Science, Bilbao, Spain.

<sup>1</sup>Corresponding author: Dr. Venkateswara R. Simhadri, U.S. Food and Drug Administration, U.S.A. E-mail: [venkateswara.simhadri@fda.hhs.gov](mailto:venkateswara.simhadri@fda.hhs.gov)

## Supplementary Information

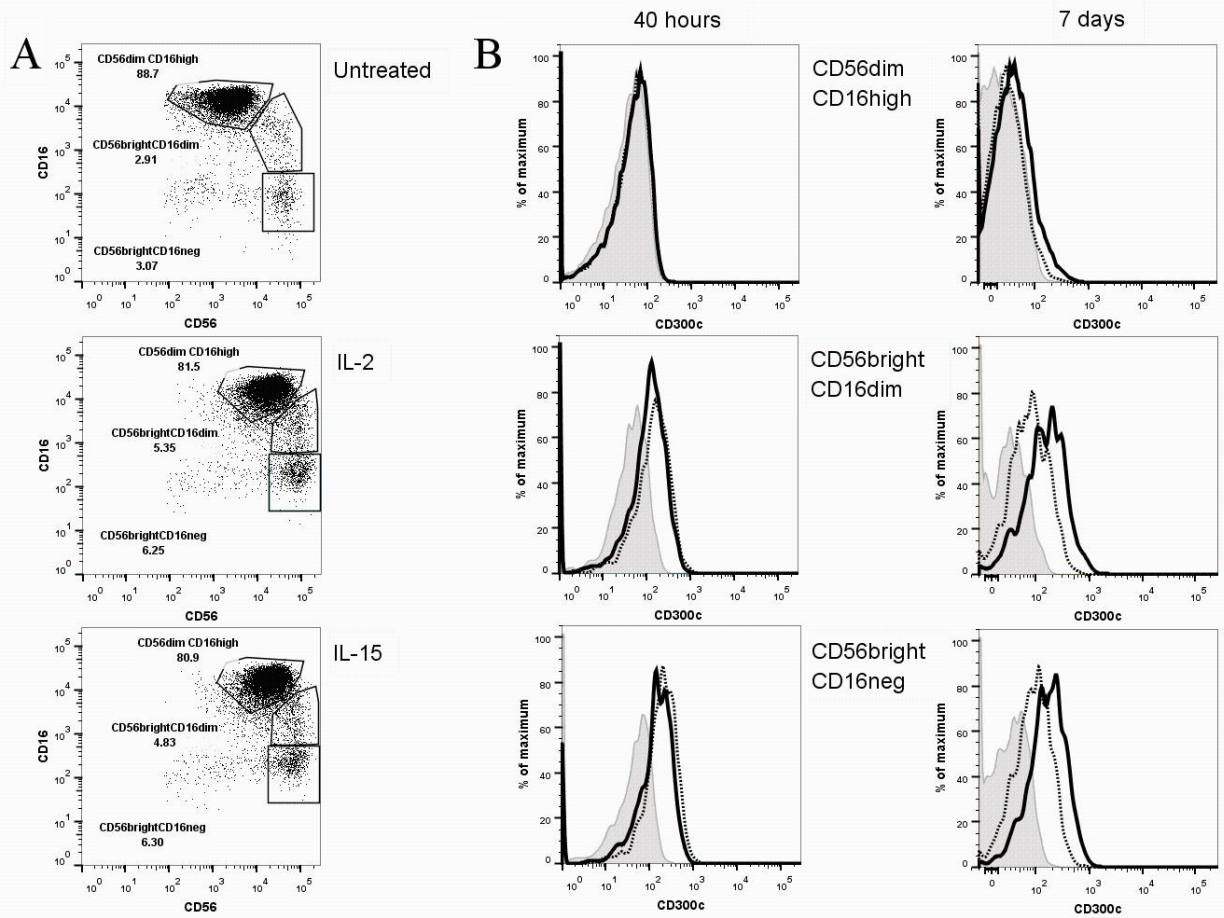

**Figure legend:** Human NK cells were purified from healthy donor and stimulated with the cytokines IL-2 and IL-15. Flow cytometric analyses were performed after 40 hours and 7 days of stimulation.

- (A) Gating strategy of all the three conditions (untreated, IL-2 and IL-15) showing the three different subsets of NK cells ( $CD56^{\text{dim}}CD16^{\text{high}}$ ,  $CD56^{\text{bright}}CD16^{\text{dim}}$  and  $CD56^{\text{bright}}CD16^{\text{neg}}$ ).
- (B) Expression of CD300c on various the three NK cell subsets at 40 hours (left column) and 7 days (right column). Shaded histograms (untreated), thick black line (IL-2 treated) and dotted black line (IL-15 treated).
